# Supplementary material for: PRER: A Patient Representation with Pairwise Relative Expression of Proteins on Biological Networks
Source: bioRxiv or medRxiv preprint supplement (doi:10.1101/2020.06.16.153999), 2020-12-08
Supplement: Supplementary file [file media-2.pdf]

# Supplementary Material for PRER: A Patient Representation with Pairwise Relative Expressions on Biological Networks

Halil İbrahim Kuru      Mustafa Buyukozkan      Oznur Tastan

## 1 Supplementary Tables

### 1.1 Clinical and Molecular Patient Data

| Number of Patients |          |          |
|--------------------|----------|----------|
|                    | censored | deceased |
| KIRC               | 297      | 156      |
| OV                 | 194      | 213      |
| BRCA               | 628      | 99       |
| LUAD               | 147      | 72       |
| LUSC               | 106      | 78       |
| COAD               | 260      | 60       |
| HNSC               | 98       | 114      |
| BLCA               | 70       | 52       |
| UCEC               | 347      | 50       |
| GBM                | 73       | 139      |

**Table 1:** Number of censored and deceased patients for each cancer type.

### 1.2 Prediction Performance

| Random Survival Forest C-indices |                 |                 |             |                 |                 |                              |
|----------------------------------|-----------------|-----------------|-------------|-----------------|-----------------|------------------------------|
|                                  | C-index         |                 |             |                 |                 | p-value                      |
|                                  | 1 <sup>st</sup> | 2 <sup>nd</sup> | median      | 3 <sup>rd</sup> | 4 <sup>th</sup> |                              |
| KIRC                             | 0.57            | 0.66            | 0.69        | 0.72            | 0.80            | <b>2.16x10<sup>-11</sup></b> |
| KIRC-prer                        | 0.58            | 0.67            | <b>0.70</b> | 0.73            | 0.83            |                              |
| OV                               | 0.40            | 0.52            | 0.55        | 0.57            | 0.66            | <b>3.94x10<sup>-8</sup></b>  |
| OV-prer                          | 0.46            | 0.54            | <b>0.57</b> | 0.60            | 0.68            |                              |
| BRCA                             | 0.38            | 0.55            | 0.60        | 0.64            | 0.82            | <b>6.15x10<sup>-16</sup></b> |
| BRCA-prer                        | 0.56            | 0.62            | <b>0.66</b> | 0.71            | 0.83            |                              |
| LUSC                             | 0.36            | 0.51            | 0.57        | 0.64            | 0.73            | <b>8.64x10<sup>-3</sup></b>  |
| LUSC-prer                        | 0.41            | 0.56            | <b>0.59</b> | 0.65            | 0.76            |                              |
| COAD                             | 0.22            | 0.43            | 0.49        | 0.53            | 0.70            | <b>0.02</b>                  |
| COAD-prer                        | 0.25            | 0.44            | <b>0.50</b> | 0.55            | 0.72            |                              |
| HNSC                             | 0.37            | 0.48            | 0.52        | 0.55            | 0.70            | <b>3.76x10<sup>-4</sup></b>  |
| HNSC-prer                        | 0.39            | 0.49            | <b>0.54</b> | 0.59            | 0.73            |                              |
| UCEC                             | 0.27            | 0.47            | 0.53        | 0.59            | 0.80            | <b>9.66x10<sup>-18</sup></b> |
| UCEC-prer                        | 0.39            | 0.62            | <b>0.66</b> | 0.72            | 0.86            |                              |
| GBM                              | 0.35            | 0.51            | 0.56        | 0.61            | 0.70            | <b>0.02</b>                  |
| GBM-prer                         | 0.41            | 0.53            | <b>0.57</b> | 0.62            | 0.71            |                              |
| BLCA                             | 0.31            | 0.47            | 0.55        | 0.61            | 0.83            | 0.09                         |
| BLCA-prer                        | 0.29            | 0.50            | <b>0.55</b> | 0.61            | 0.71            |                              |
| LUAD                             | 0.40            | 0.55            | 0.59        | 0.66            | 0.80            | 1                            |
| LUAD-prer                        | 0.31            | 0.47            | 0.51        | 0.57            | 0.74            |                              |

**Table 2:** The comparison of RFSs models' performances that are trained with individual features and pairwise ranking representations (PRER) for different cancer types. The methods are compared at the mean with four different quartile values of the 100 repeated runs, where each run is conducted with a random split of train and test data.

## 2 Supplementary Figures

### 2.1 Important PRER Features

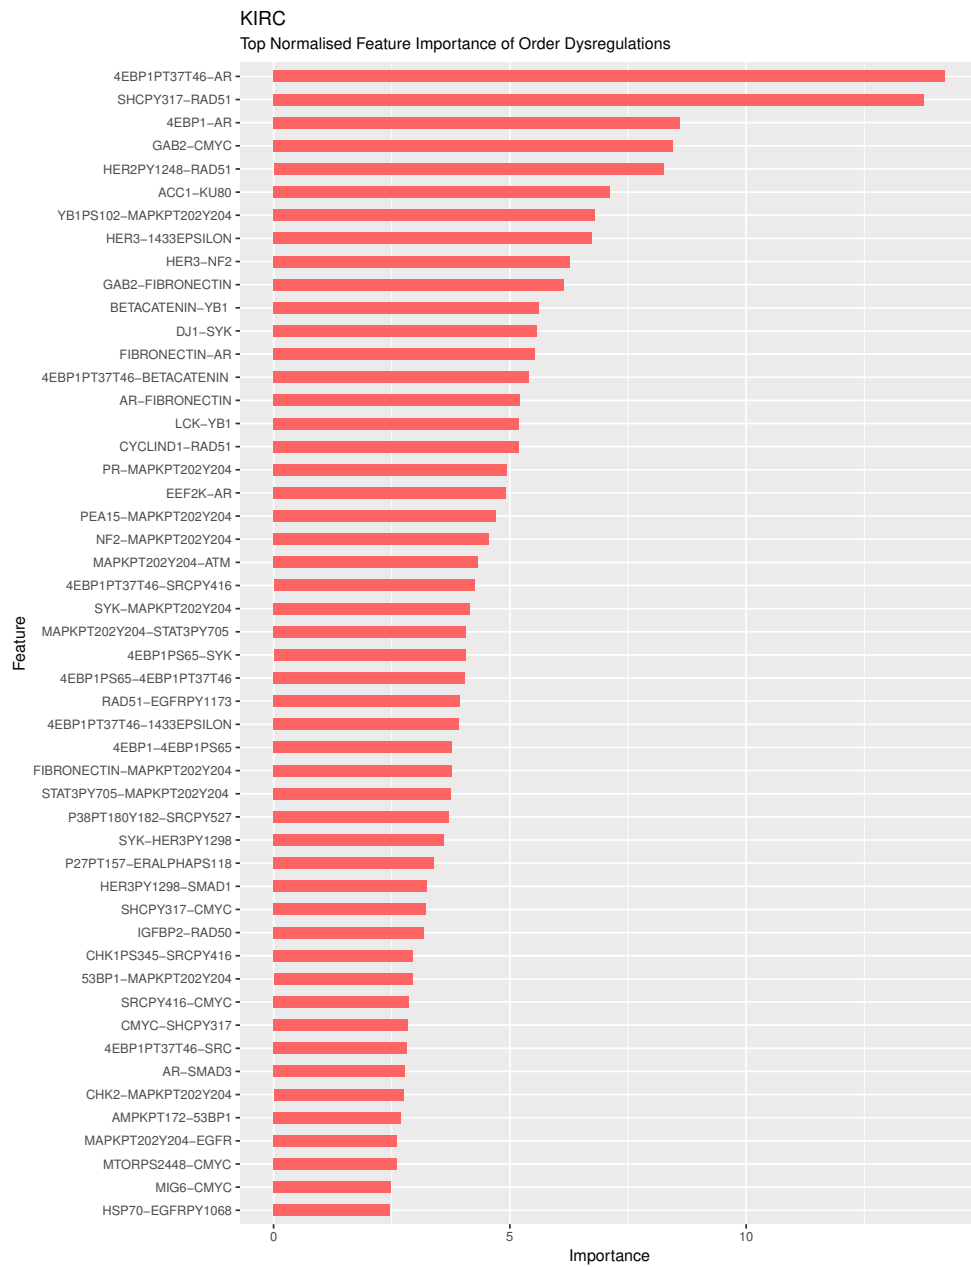

**Figure 1:** Variable importance of significant pairwise ranking embeddings for kidney renal clear cell carcinoma

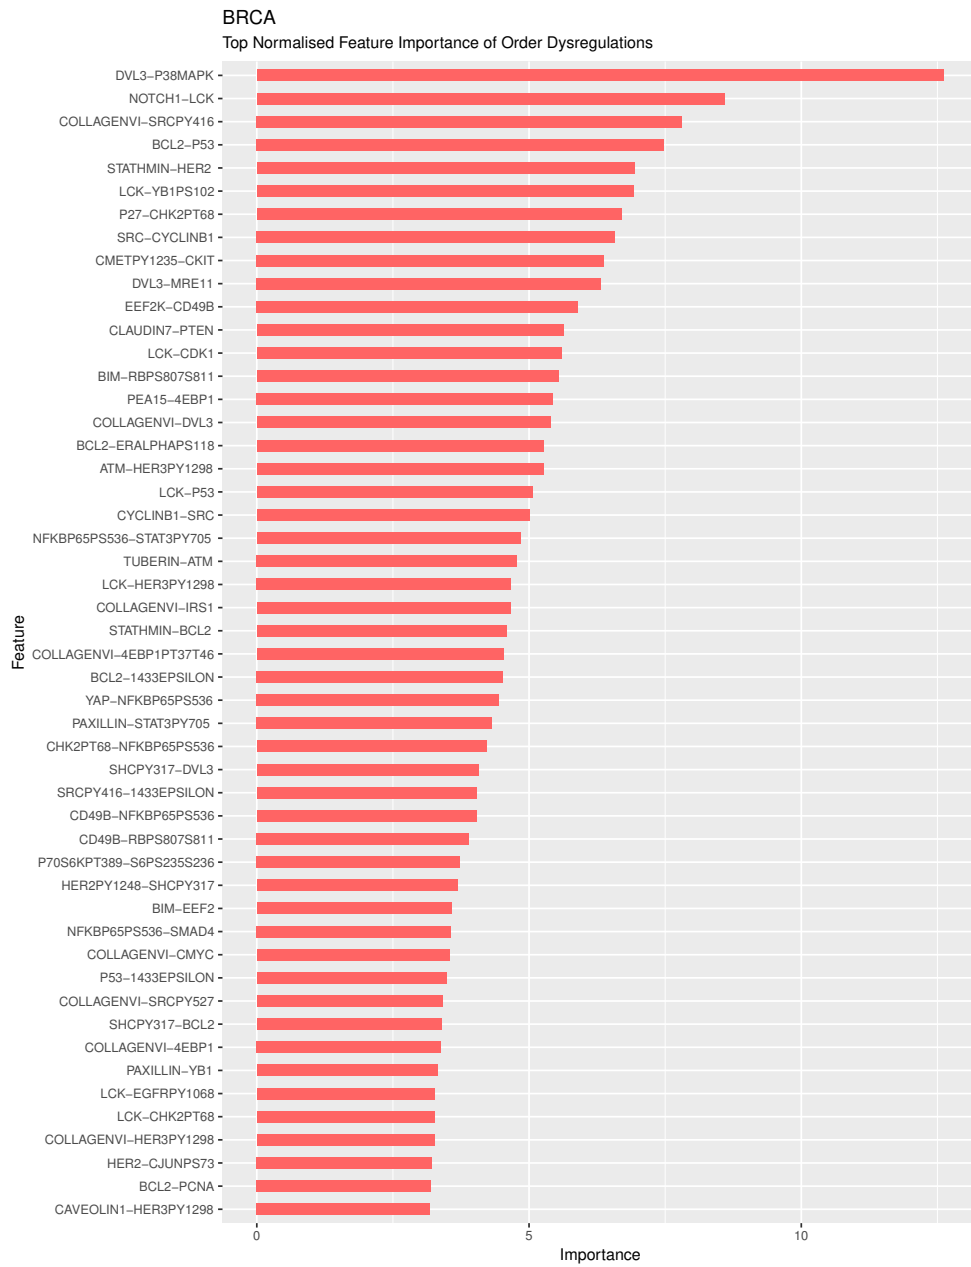

**Figure 2:** Variable importance of significant pairwise ranking embeddings for breast invasive carcinoma

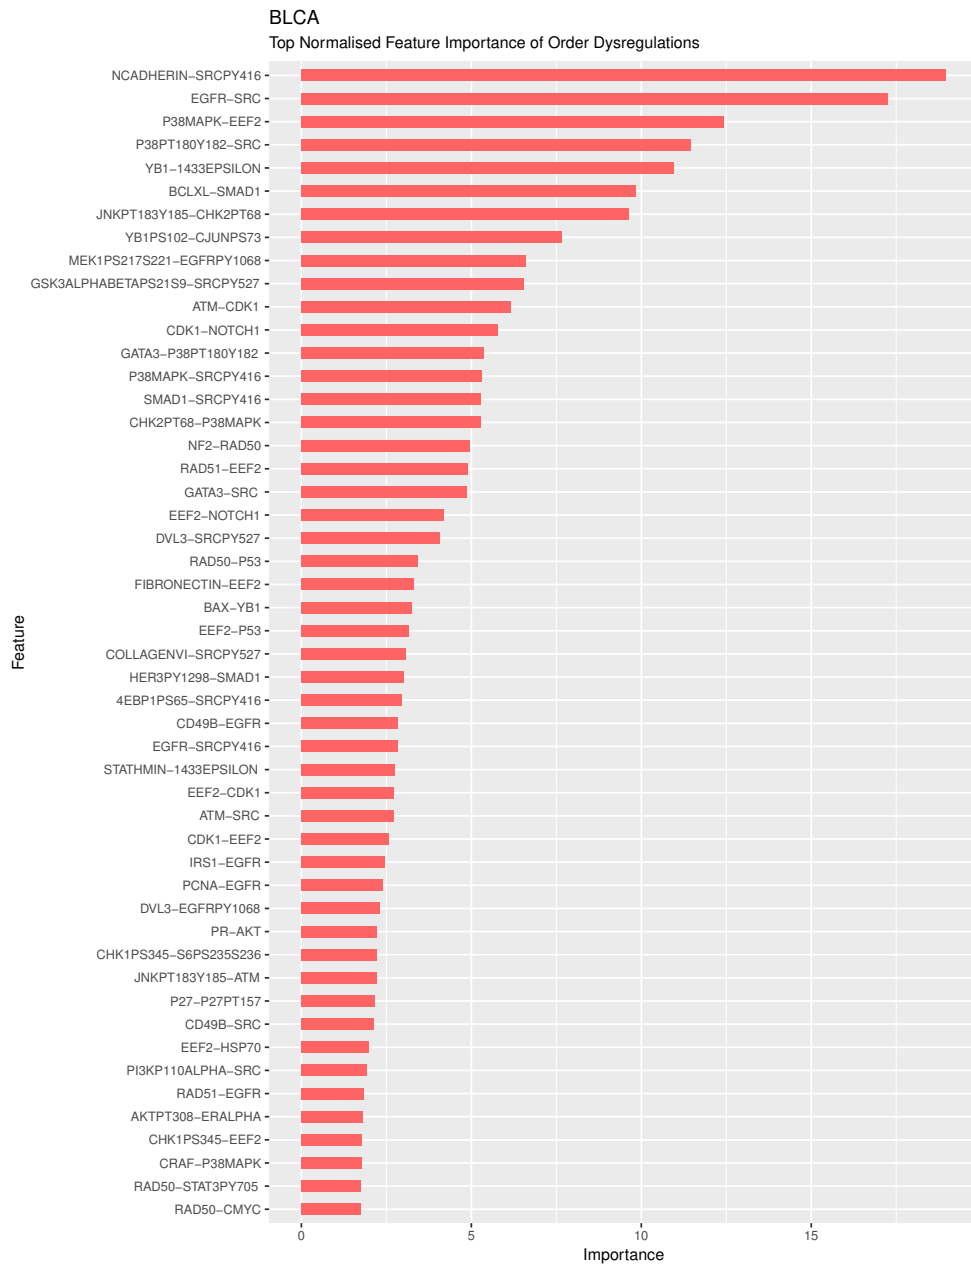

**Figure 3:** Variable importance of significant pairwise ranking embeddings for bladder urothelial carcinoma

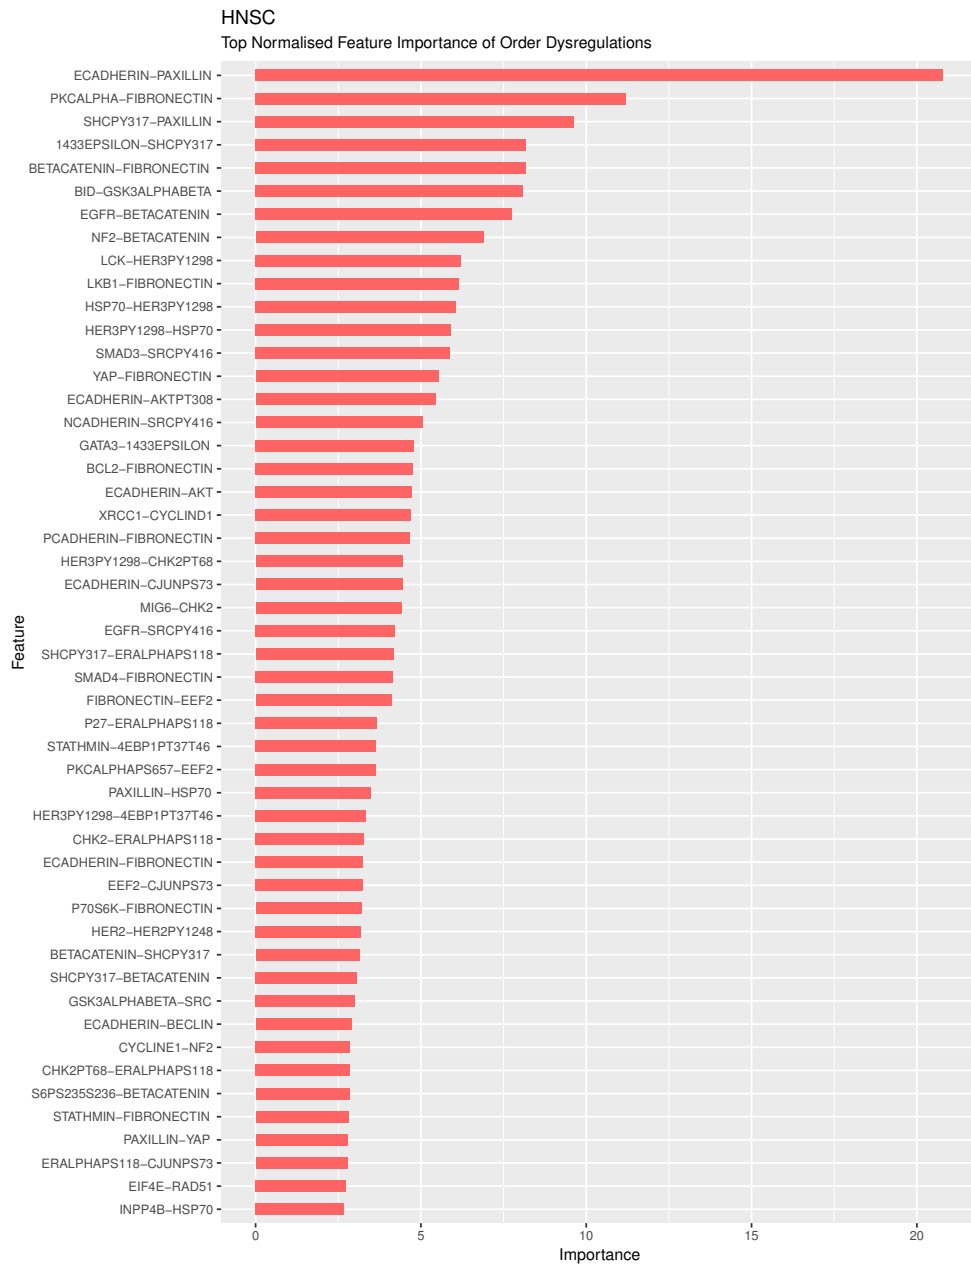

**Figure 4:** Variable importance of significant pairwise ranking embeddings for head and neck squamous cell carcinoma

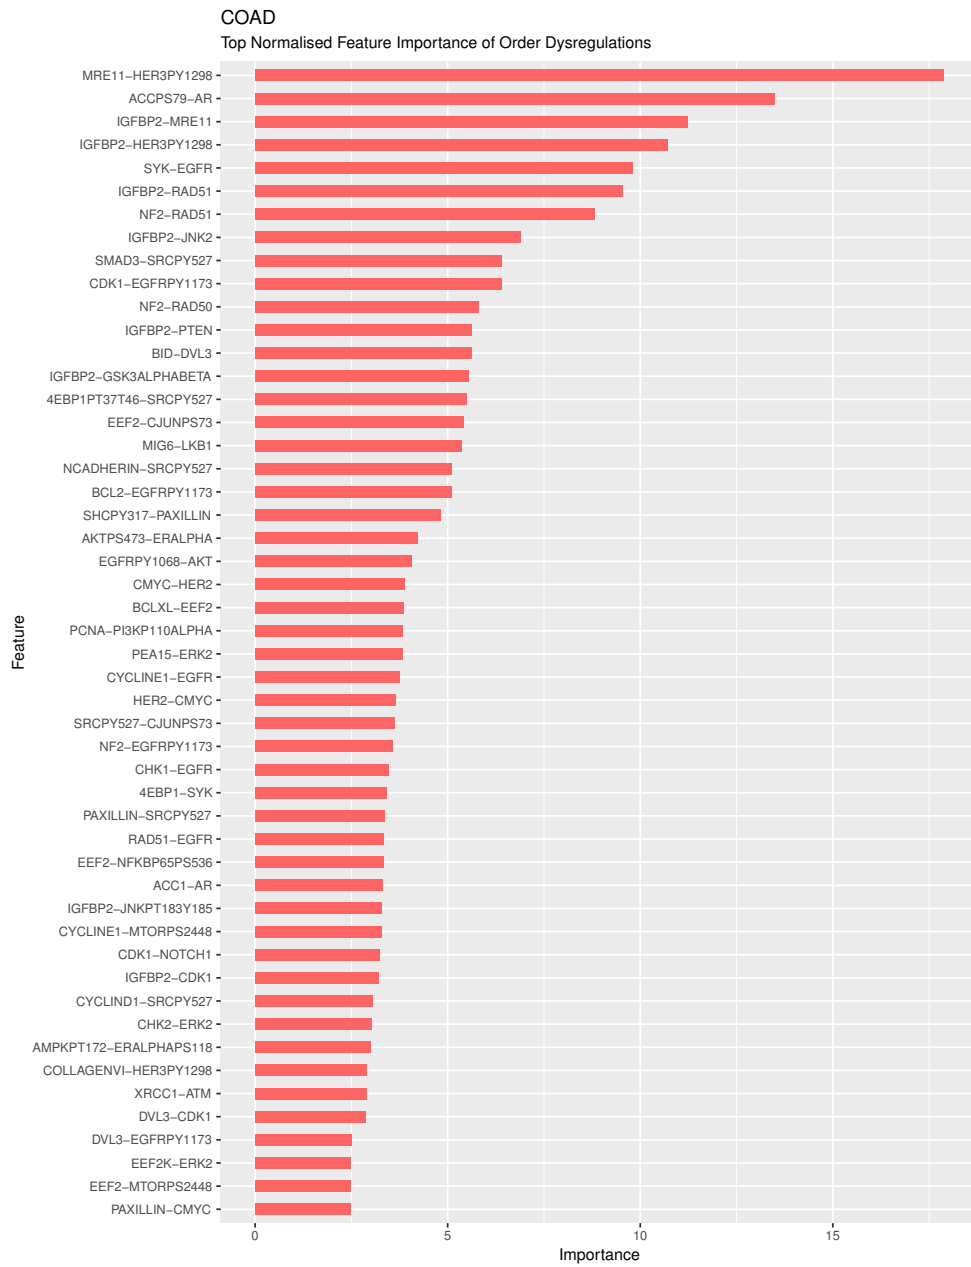

**Figure 5:** Variable importance of significant pairwise ranking embeddings for colon adenocarcinoma

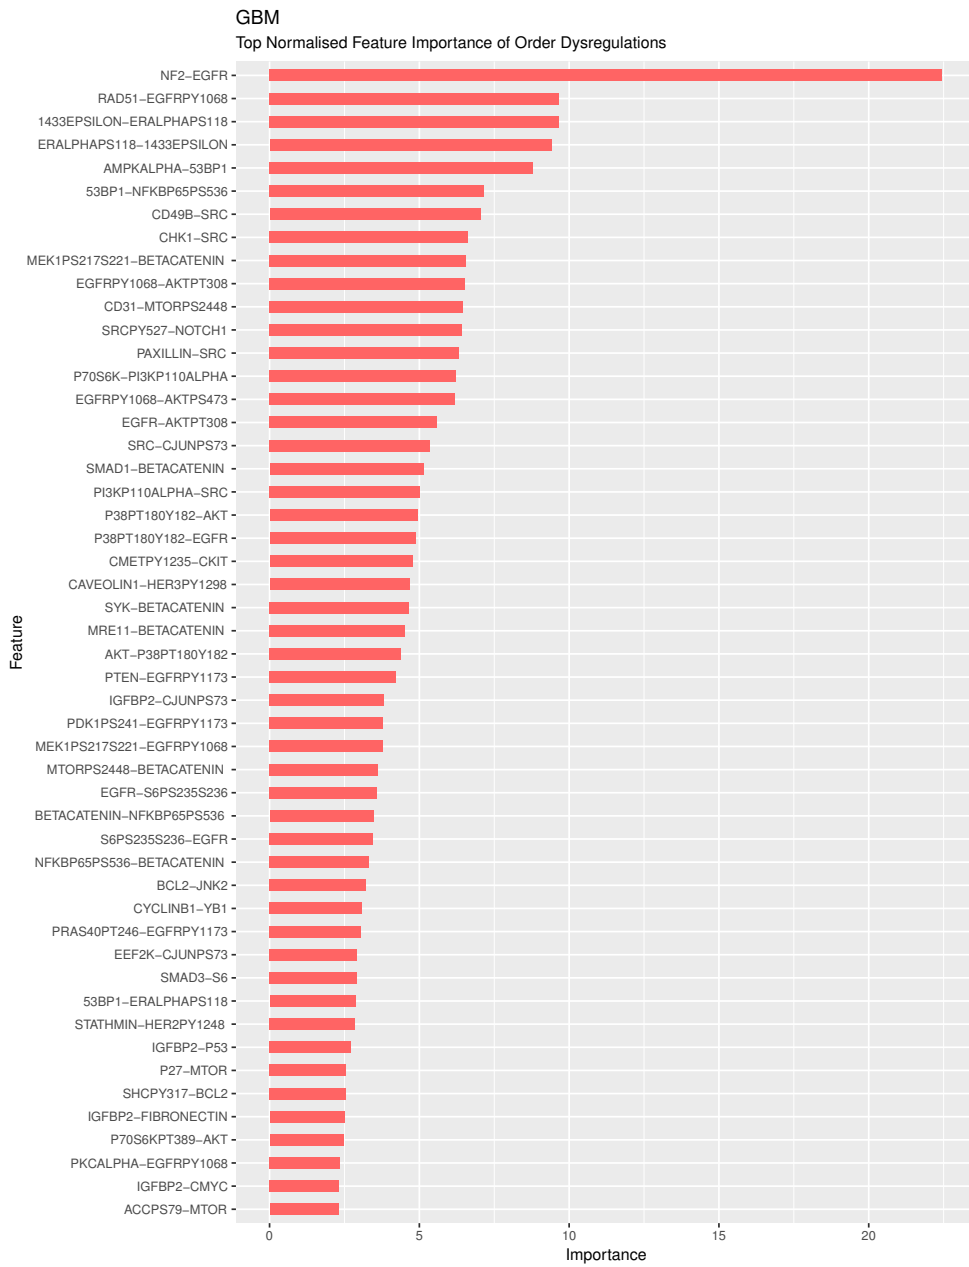

**Figure 6:** Variable importance of significant pairwise ranking embeddings for glioblastoma multiforme

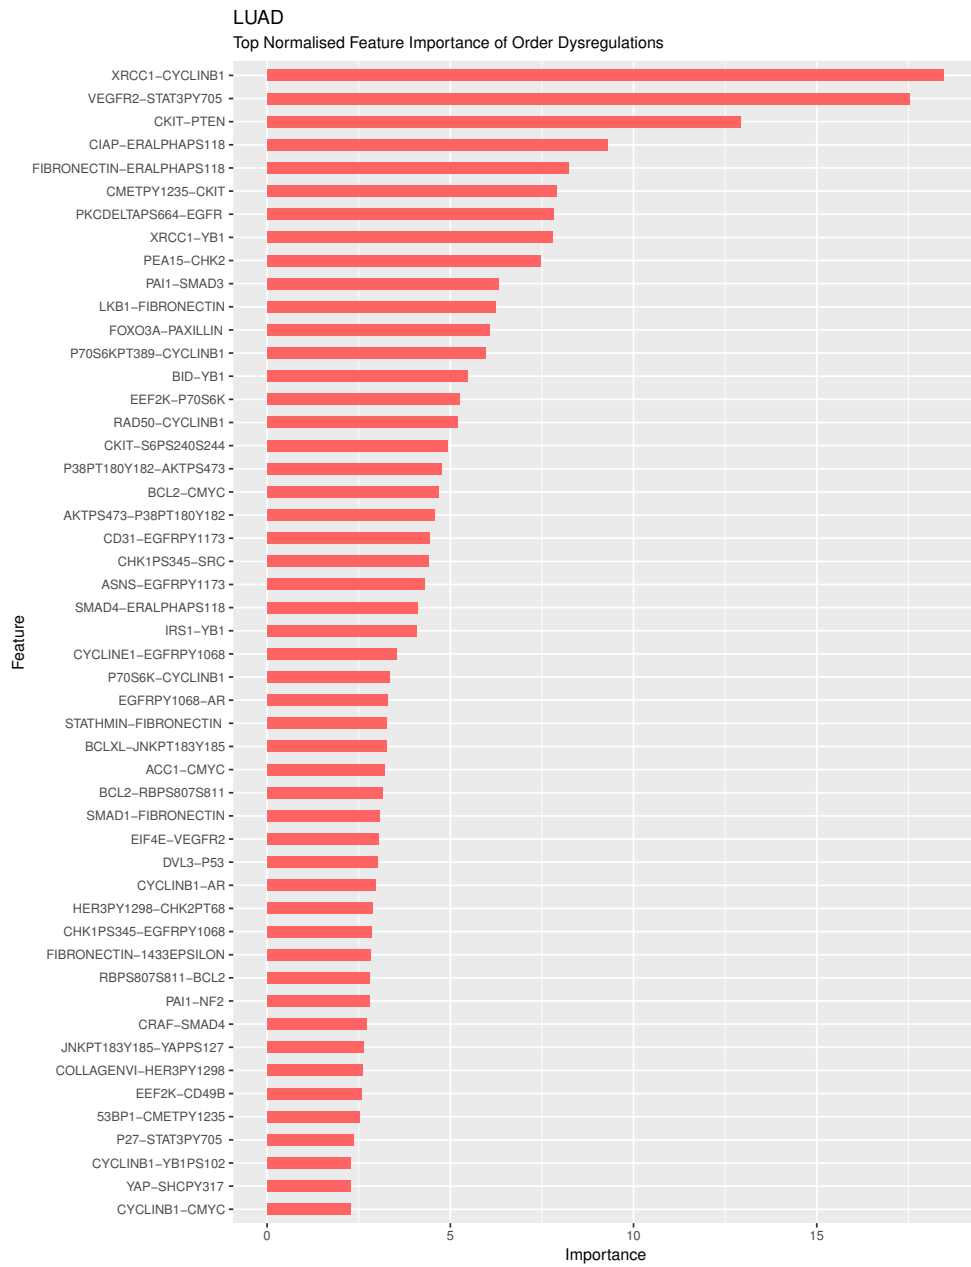

**Figure 7:** Variable importance of significant pairwise ranking embeddings for lung adenocarcinoma



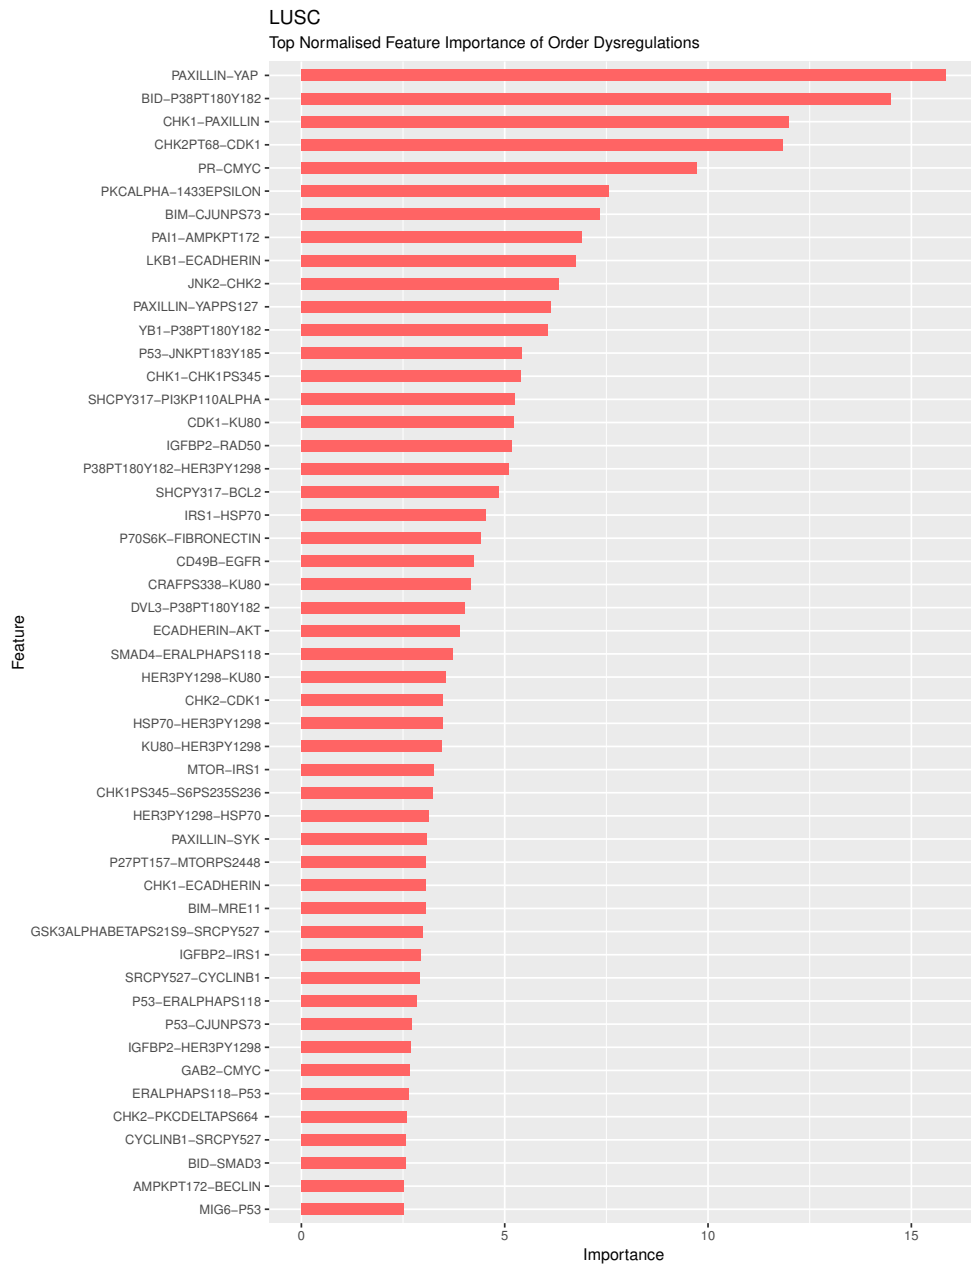

**Figure 8:** Variable importance of significant pairwise ranking embeddings for lung squamous cell carcinoma

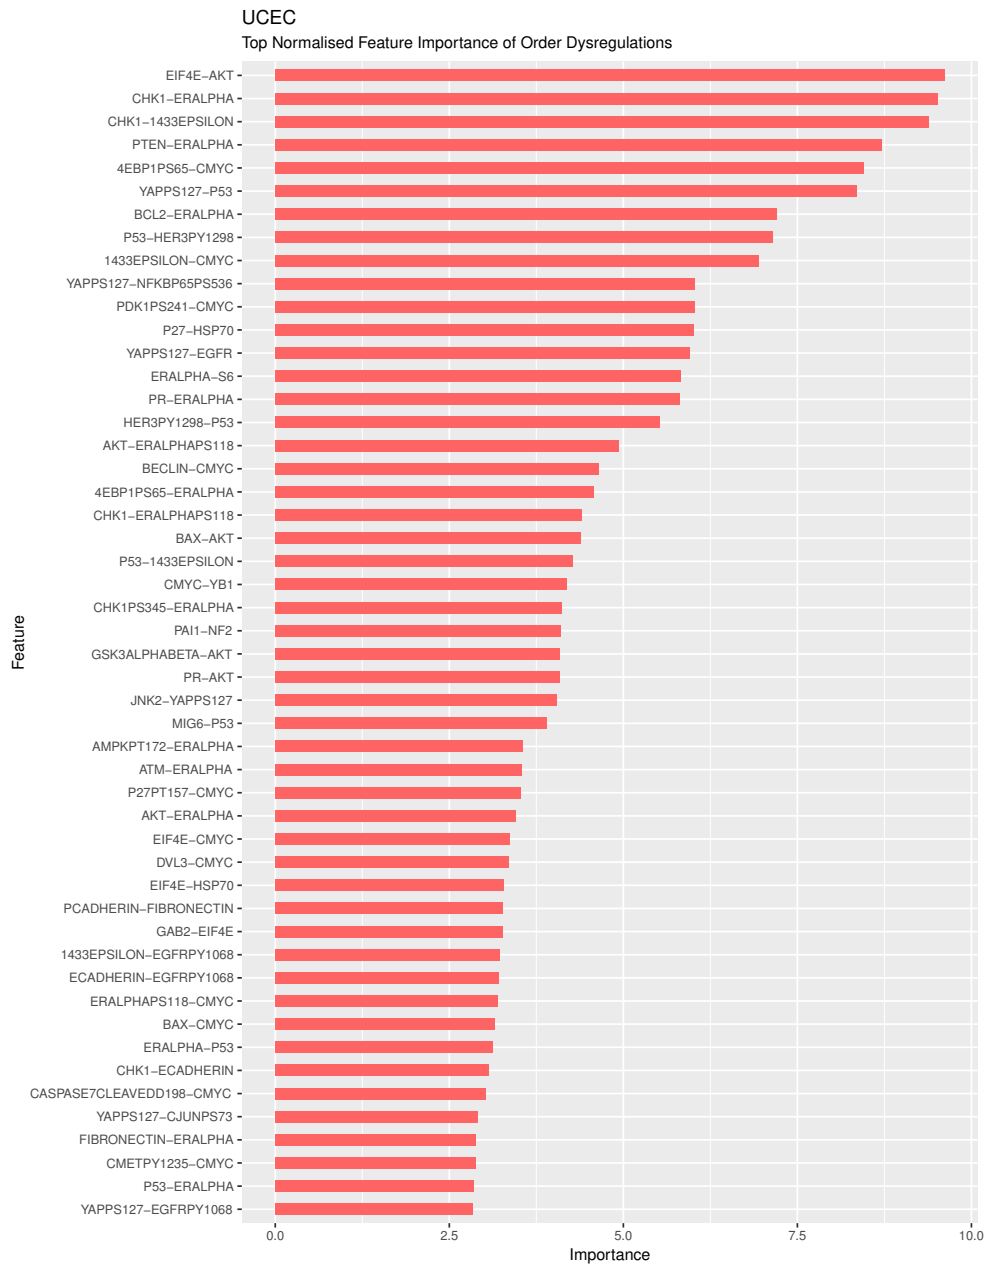

**Figure 9:** Variable importance of significant pairwise ranking embeddings for uterine corpus endometrial carcinoma

## 2.2 PRER Networks

### KIRC

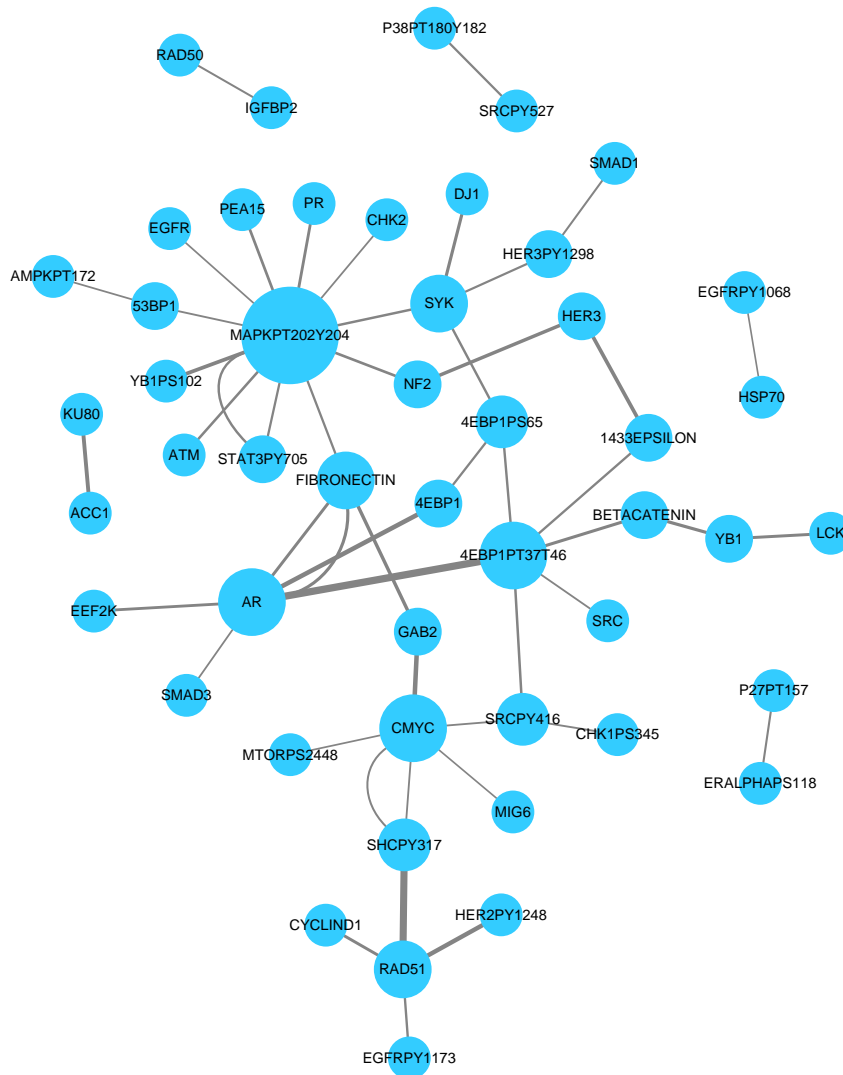

**Figure 10:** Nodes represent proteins that appear in the top 50 pairwise ranking embeddings for kidney renal clear cell carcinoma; edges represent that two proteins participate in a pairwise rank order feature together

# BRCA

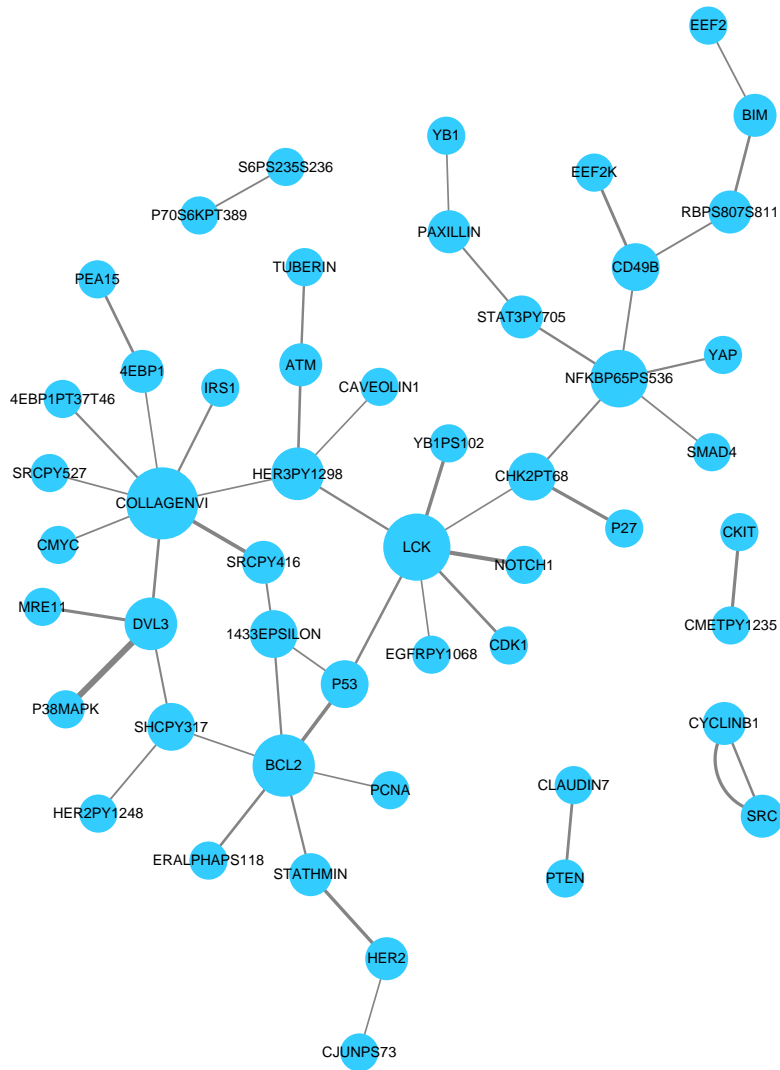

**Figure 11:** Nodes represent proteins that appear in the top 50 pairwise ranking embeddings for breast invasive carcinoma; edges represent that two proteins participate in a pairwise rank order feature together

## BLCA

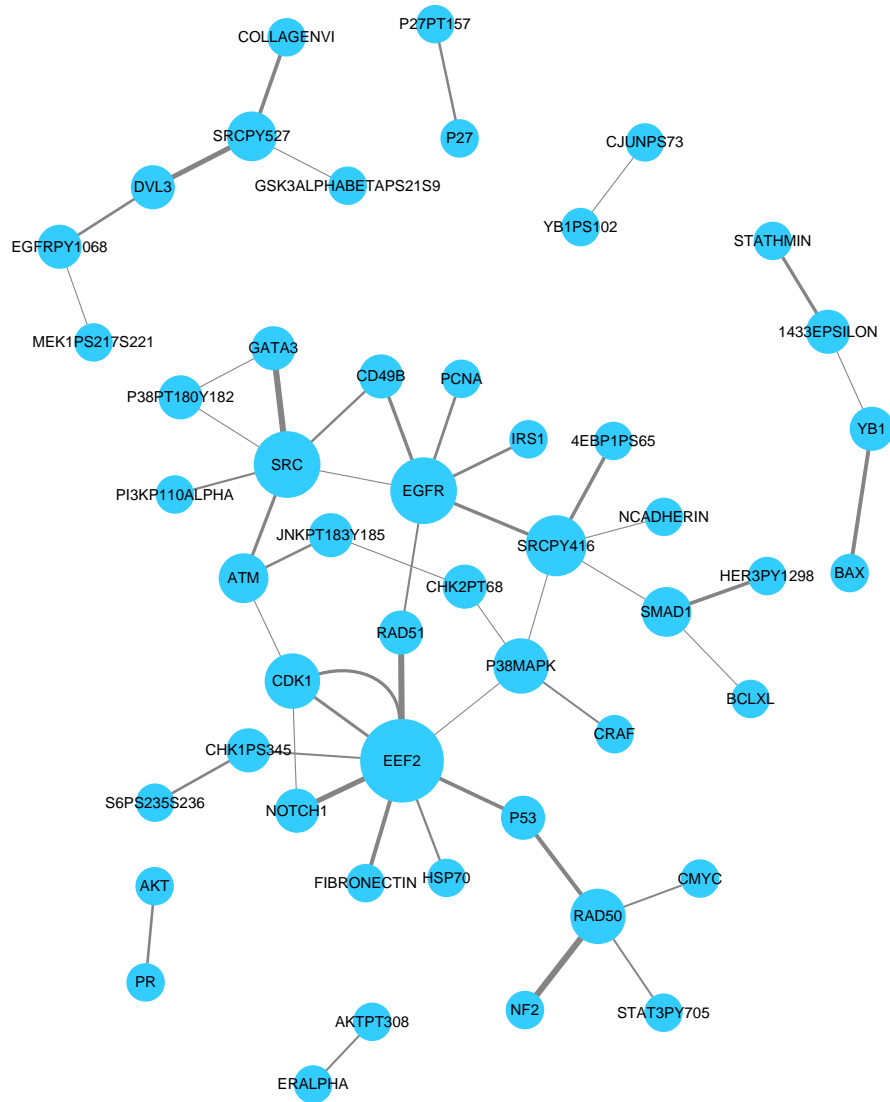

**Figure 12:** Nodes represent proteins that appear in the top 50 pairwise ranking embeddings for bladder urothelial carcinoma; edges represent that two proteins participate in a pairwise rank order feature together



# COAD

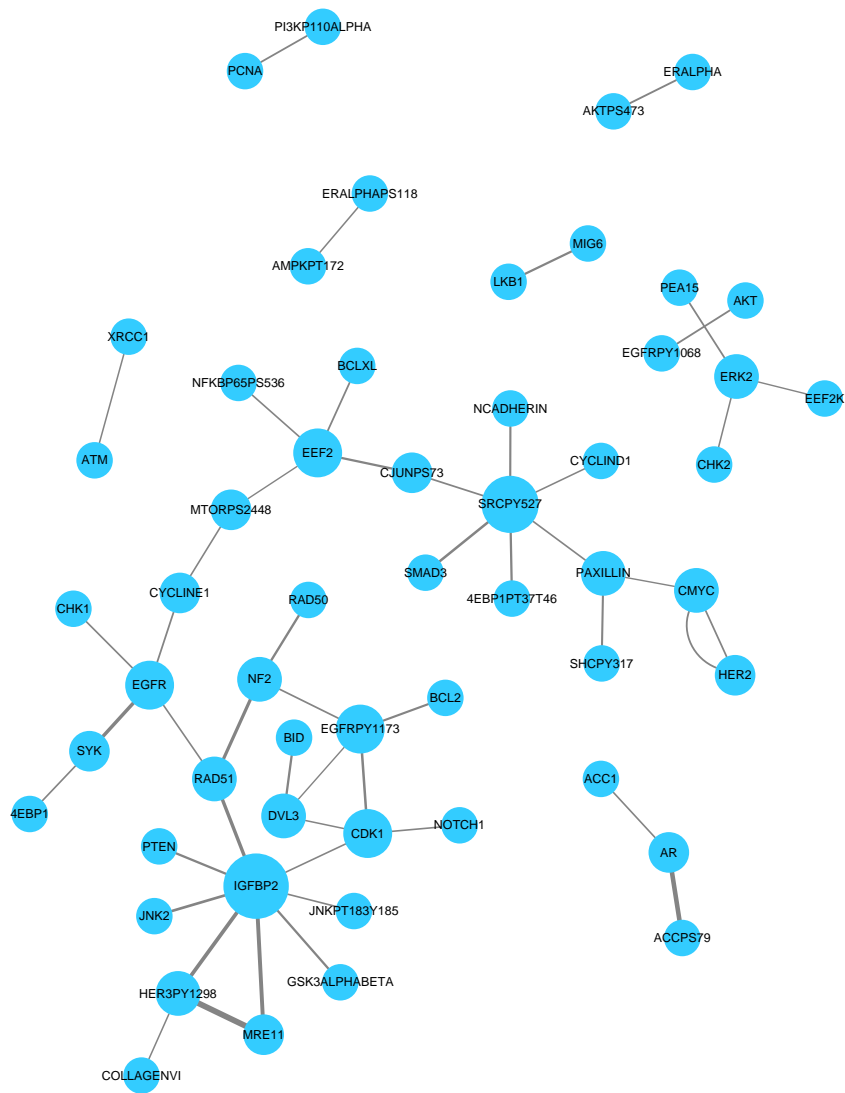

**Figure 14:** Nodes represent proteins that appear in the top 50 pairwise ranking embeddings for colon adenocarcinoma; edges represent that two proteins participate in a pairwise rank order feature together

# GBM

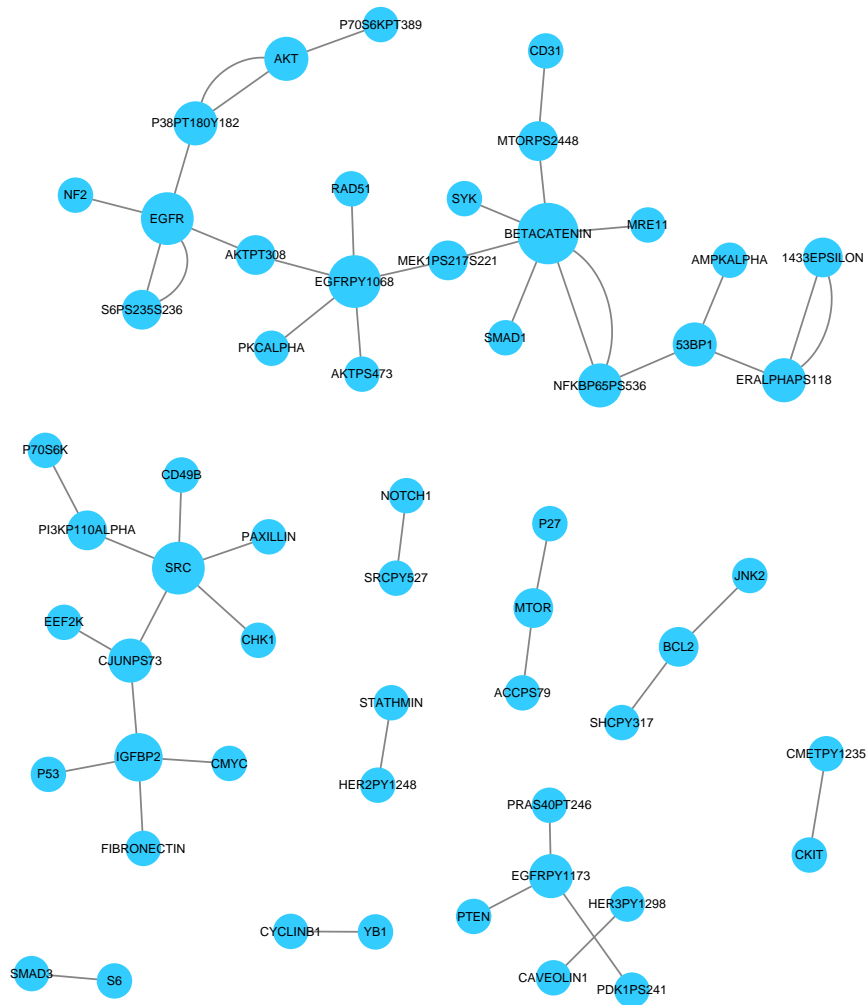

**Figure 15:** Nodes represent proteins that appear in the top 50 pairwise ranking embeddings for glioblastoma multiforme; edges represent that two proteins participate in a pairwise rank order feature together





# LUSC

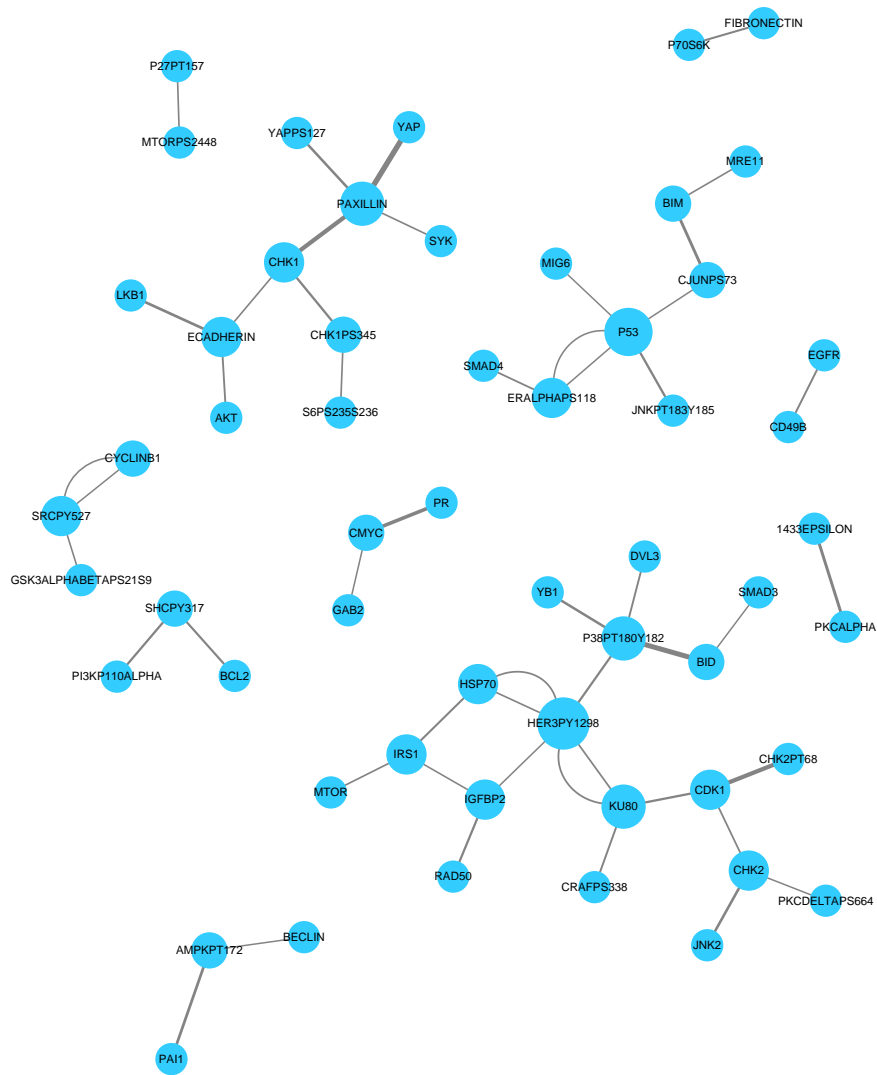

**Figure 17:** Nodes represent proteins that appear in the top 50 pairwise ranking embeddings for lung squamous cell carcinoma; edges represent that two proteins participate in a pairwise rank order feature together



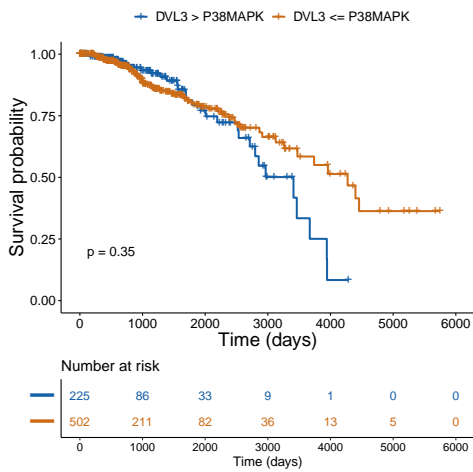

(a) BRCA

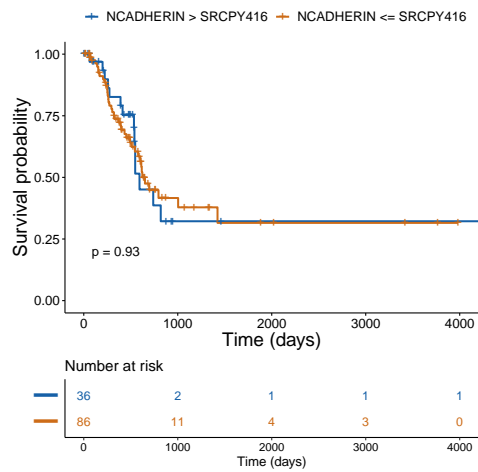

(b) BLCA

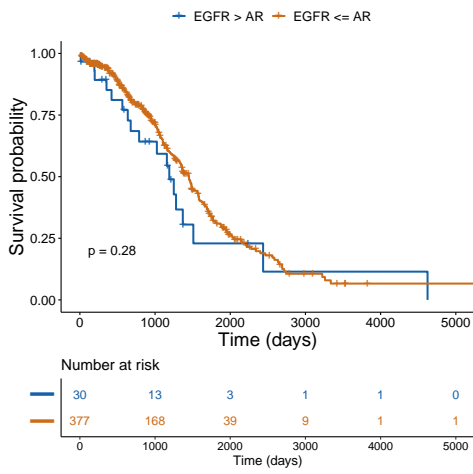

(c) OV

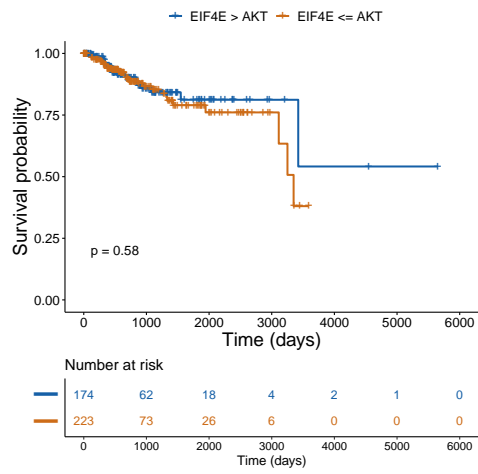

(d) UCEC

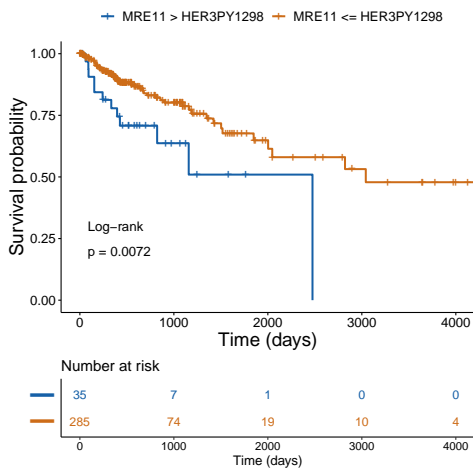

(e) COAD

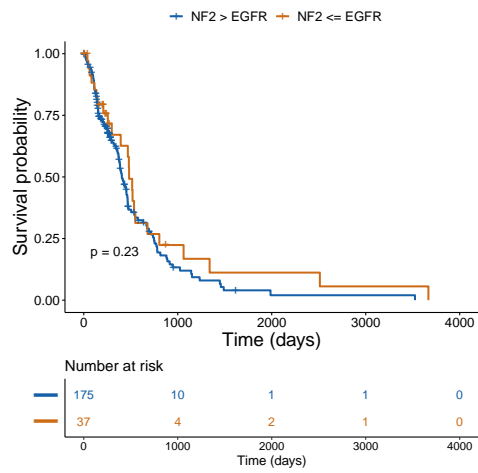

(f) GBM

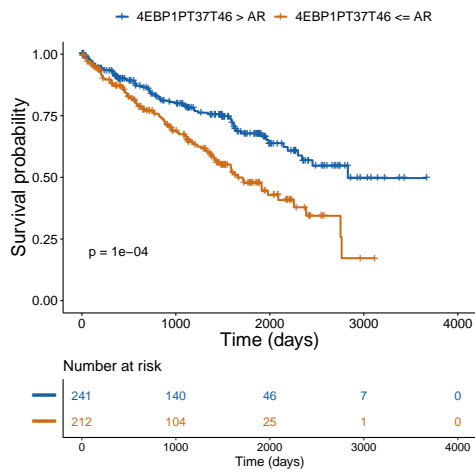

(g) KIRC

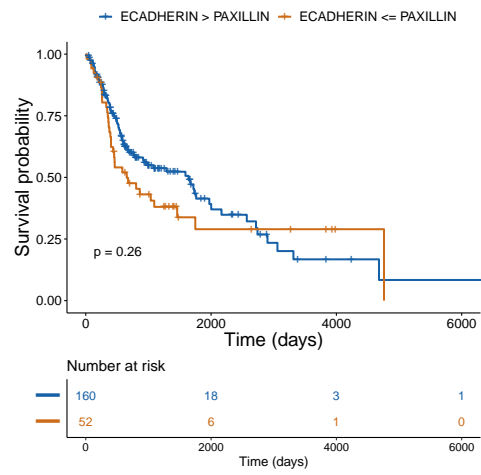

(h) HNSC

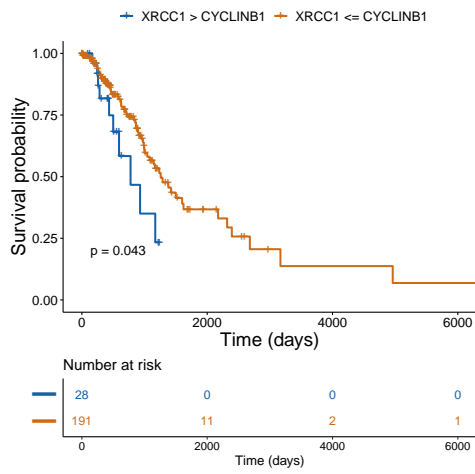

(i) LUAD

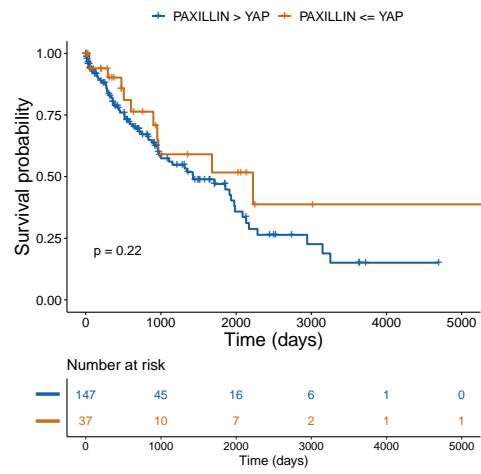

(j) LUSC

**Figure 19:** Kaplan-Meier plot for each cancer type based on overall survival. Number at risk denotes the number of patients at risk at a given time, and p-value is calculated with the log-rank test.
